# Supplementary material
Source: PubMed Central journal article supplement (PMC6888796)
Supplement: 13280_2019_1184_MOESM1_ESM.pdf [file 13280_2019_1184_MOESM1_ESM.pdf]

*Ambio*

Electronic Supplementary Material

*This supplementary material has not been peer reviewed.*

**Title: Potential pathogen communities in highly polluted river ecosystems:  
geographical distributions and environmental influences**

Authors: Yuzhan Yang<sup>a</sup>, Yang Hou<sup>b\*</sup>, Min Ma<sup>a</sup>, Aibin Zhan<sup>a,c</sup>

<sup>a</sup>Research Center for Eco-Environmental Sciences, Chinese Academy of Sciences, 18

Shuangqing Road, Haidian District, Beijing 100085, China;

<sup>b</sup>Beijing Dongcheng District Food and Drug Safety Monitoring Center, 12-14

Zhushikou Street East, Beijing 100050, China;

<sup>c</sup>University of Chinese Academy of Sciences, 19A Yuquan Road, Shijingshan District,

Beijing 100049, China.

**Figure S1.** A heatmap of environmental variables along North Canal River (NCR)

revised from Yang et al. (2019a).

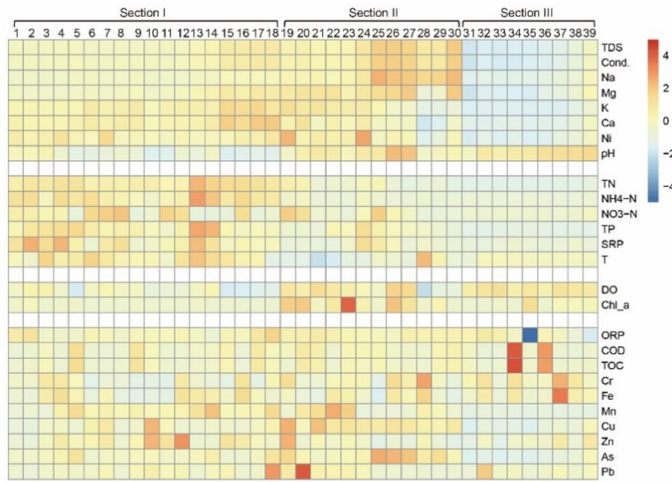

**Table S1.** The correlation between community of potential pathogenic bacteria and environmental / spatial variables selected out through forward selection. AdjR<sup>2</sup>Cum = adjusted cumulative R square.

|                       | No. | Variables | AdjR <sup>2</sup> Cum | <i>p</i> -value |
|-----------------------|-----|-----------|-----------------------|-----------------|
| Environmental factors | 1   | TN        | 0.347                 | 0.000           |
|                       | 2   | Cond      | 0.403                 | 0.003           |
|                       | 3   | pH        | 0.435                 | 0.020           |
|                       | 4   | TP        | 0.485                 | 0.004           |
| Spatial factors       | 1   | V2        | 0.168                 | 0.001           |
|                       | 2   | V5        | 0.217                 | 0.015           |
|                       | 3   | V9        | 0.251                 | 0.040           |
